# Supplementary material for: Changes in Antibiotic Resistance Gene Levels in Soil after Irrigation with Treated Wastewater: A Comparison between Heterogeneous Photocatalysis and Chlorination
Source: PubMed Central journal article supplement (PMC8007107; doi:10.1021/acs.est.0c01565), 2020-05-15
Supplement: es0c01565_si_001.pdf [file es0c01565_si_001.pdf]

## Supporting Information

# Changes in antibiotic resistance gene levels in soil after irrigation with treated wastewater: a comparison between heterogeneous photocatalysis and chlorination

*Ian Zammit†, Roberto B. M. Marano ‡§, Vincenzo Vaianoli, Eddie Cytryn ‡\*, Luigi*

*Rizzot\**

† Department of Civil Engineering, University of Salerno, Via Giovanni Paolo II

132, 84084 Fisciano, Italy;

‡Department of Soil Chemistry, Plant Nutrition and Microbiology, Institute of Soil,

Water and Environmental Sciences, Volcani Center, Agricultural Research

Organization, Rishon LeZion, Israel.

§ Department of Agroecology and Plant Health, The Robert H. Smith Faculty of  
Agriculture, Food and Environment, The Hebrew University of Jerusalem, Rehovot,  
Israel.

|| Department of Industrial Engineering, University of Salerno, Via Giovanni Paolo II

132, 84084 Fisciano, Italy

\* corresponding author [l.rizzo@unisa.it](mailto:l.rizzo@unisa.it); [eddie@volcani.agri.gov.it](mailto:eddie@volcani.agri.gov.it)

The Supporting Information is 3 pages long with 1 table and 1 figure

| Date              | Irrigated Series                            |         |          |          | mg of nitrogen added | Fertilised Series | Days since Start |
|-------------------|---------------------------------------------|---------|----------|----------|----------------------|-------------------|------------------|
|                   | FW (mL)                                     | WW (mL) | OCI (mL) | HPC (mL) |                      |                   |                  |
| 2018-10-18        | 800                                         | 800     | 800      | 800      |                      |                   | 0                |
| 2018-10-21        | 100                                         | 100     | 100      | 100      |                      |                   | 3                |
| 2018-10-23        | 150                                         | 150     | 150      | 150      |                      |                   | 5                |
| 2018-10-25        | 250                                         | 250     | 250      | 250      |                      |                   | 7                |
| 2018-10-28        | 150                                         | 150     | 150      | 150      |                      |                   | 10               |
| 2018-10-29        | 150                                         | 150     | 150      | 150      | 8.25                 | All               | 11               |
| 2018-10-31        | 150                                         | 150     | 150      | 150      |                      |                   | 13               |
| 2018-11-01        | 150                                         | 150     | 150      | 150      |                      |                   | 14               |
| 2018-11-04        | 200                                         | 200     | 200      | 200      |                      |                   | 17               |
| <b>2018-11-04</b> | <b>Soil sampling of all pots (pre-tWW)</b>  |         |          |          |                      |                   |                  |
| 2018-11-05        |                                             |         | 180      |          |                      |                   | 18               |
| 2018-11-06        | 180                                         | 180     |          | 180      |                      |                   | 19               |
| 2018-11-08        | 400                                         | 400     | 400      | 400      |                      |                   | 21               |
| 2018-11-11        |                                             | 170     |          | 170      | 9.35                 | HPC, WW, FW       | 24               |
| 2018-11-12        | 170                                         |         | 170      |          | 9.35                 | OCI               | 25               |
| 2018-11-14        | 170                                         | 170     | 170      | 170      |                      |                   | 27               |
| 2018-11-15        | 300                                         | 300     | 300      | 300      |                      |                   | 28               |
| 2018-11-18        | 175                                         | 175     | 175      |          |                      |                   | 31               |
| 2018-11-19        |                                             |         |          | 175      |                      |                   | 32               |
| 2018-11-21        | 200                                         | 200     | 200      | 200      |                      |                   | 34               |
| 2018-11-22        | 250                                         | 250     | 250      | 250      |                      |                   | 35               |
| 2018-11-25        | 170                                         | 170     | 170      |          |                      |                   | 38               |
| 2018-11-26        | 100                                         | 100     | 100      | 300      | 5.5                  | All               | 39               |
| 2018-11-29        | 420                                         | 420     | 420      | 390      |                      |                   | 42               |
| 2018-12-02        | 185                                         | 185     |          | 185      | 10.175               | HPC, WW, FW       | 45               |
| 2018-12-03        |                                             |         | 185      |          | 10.175               | OCI               | 46               |
| 2018-12-05        | 250                                         | 250     | 250      | 250      |                      |                   | 48               |
| 2018-12-09        | 350                                         | 350     | 350      |          |                      |                   | 52               |
| 2018-12-10        |                                             |         |          | 400      |                      |                   | 53               |
| 2018-12-11        | 300                                         | 300     | 300      | 250      |                      |                   | 54               |
| 2018-12-12        | 110                                         | 110     | 110      | 110      |                      |                   | 55               |
| <b>2018-12-13</b> | <b>Soil sampling of all pots (post-tWW)</b> |         |          |          |                      |                   |                  |
|                   |                                             |         |          |          |                      |                   |                  |
| Total             | 5830 mL                                     | 5830 mL | 5830 mL  | 5830 mL  | 27.8 mg              |                   |                  |

Table S1 – irrigation log of all pots

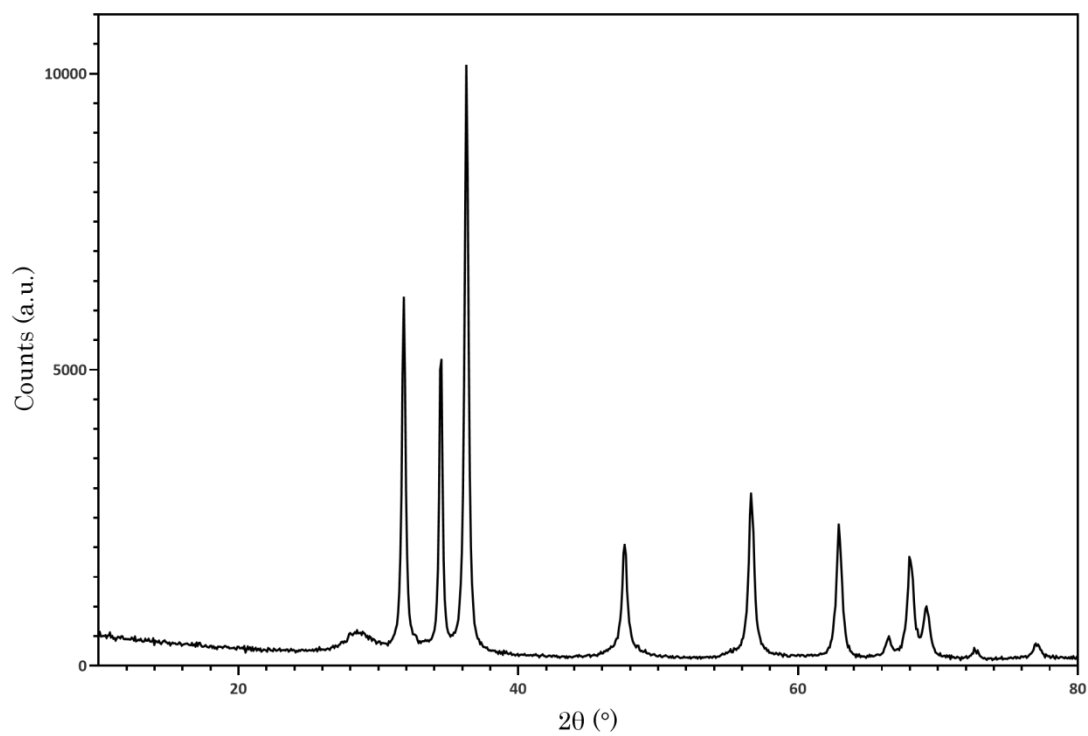

Figure S1 – XRD of the synthesised photocatalyst - 4% cerium doped zinc oxide
